# Supplementary material
Source: PubMed Central journal article supplement (PMC8223444)
Supplement: NIHMS1696791-supplement-8.pdf [file NIHMS1696791-supplement-8.pdf]

## Online Repository

### **The Efficacy of Omalizumab Treatment in Chronic Spontaneous Urticaria is Associated with Basophil Phenotypes**

Kirti J. Johal, MD<sup>1,2</sup>, Kristin L. Chichester, MS<sup>1</sup>, Eric T. Oliver, MD<sup>1</sup>, Kelly C. Devine, RN, BSN<sup>1</sup>, Anja P. Bieneman, BS<sup>1</sup>, John T. Schroeder, PhD<sup>1</sup>, Donald W. MacGlashan, Jr., MD, PhD<sup>1</sup>,  
Sarbjit S. Saini, MD<sup>1</sup>.

<sup>1</sup>Division of Allergy and Clinical Immunology, Department of Medicine, Johns Hopkins University School of Medicine

<sup>2</sup>Division of Allergy & Immunology, Department of Medicine, George Washington University School of Medicine and Health Sciences

**Corresponding Author:**

Sarbjit S. Saini, MD;  
Johns Hopkins Asthma and Allergy Center  
5501 Hopkins Bayview Circle, 2B.71B  
Baltimore, MD 21224  
Phone: 410-550-2129  
Fax; 410-550-2527  
Email: ssaini@jhmi.edu

**Table E1**

|                           | <b>Basopenic (B)</b> | <b>Non-Basopenic (NB)</b> |
|---------------------------|----------------------|---------------------------|
| <b>Responder (R)</b>      | 1                    | 6                         |
| <b>Non-Responder (NR)</b> | 7                    | 3                         |

Basopenic <8000 basophils /mL

Non-responder < 10% histamine release in response to optimal dose of anti-IgE

Chi-squared p = 0.004

### Supplemental Figure Legends:

**Figure E1:** Basophil counts (alcian blue-based) distribution for all subjects (n=18) at baseline.

**Figure E2:** Consort diagram of subject enrollment.

**Figure E3.** *In vitro* response kinetics for stimulation with FMLP during treatment with omalizumab. (A) Histamine release in response to 1  $\mu$ M FMLP for the 3 groups (2-parameter categorization). (B) BAT CD63 response to 1  $\mu$ M FMLP for the 3 groups. For both panels, gray line – CSU-R/NB average, Orange line – CSU-NR/NB average, Blue line – CSU-NR/B average.

**Figure E4:** *In vitro* basophil CD63 expression response to anti-IgE stimulation at the indicated day of study. (A) Responder/Non-basopenics (CSU-R/NB), (n=6). (B) Non-responder/Non-basopenics (CSU-NR/NB) (N=3). (C) Non-responder/basopenics (CSU-NR/B) (n=7). The colored lines represent each visit day.

**Figure E5:** Kinetics of the decrease in symptom scores vs. the kinetics of the decrease in basophil surface IgE. Three groups defined by the relationships;  $IgE T_{1/2} \ll UAS T_{1/2}$ ,  $IgE T_{1/2} \approx UAS T_{1/2}$ ,  $IgE T_{1/2} \gg UAS T_{1/2}$ . (A) The symptom change relative to baseline in these 3 groups and (B) kinetics of the basophil surface IgE changes relative to baseline in the same 3 groups as A. Arrows indicate 50% of measure.



**Figure E6:** Kinetics of basophil counts during treatment. Average counts grouped by 2-parameter categories. Black line (n=6)– CSU-R/NB average, Orange line (n=3) – CSU-NR/NB average, Blue line (n=7) – CSU-NR/B average, Green dashed line (n=16) – Average.

**Figure E7:** (A) Kinetics of pDC surface IgE, (B) total FcεRI and (C) unoccupied FcεRI during treatment for 5 subjects.

**Table E1:** Association between responder status (R, NR) and basopenic status (NB,B). Chi-squared analysis,  $p < 0.004$ .
