# Supplementary material
Source: PubMed Central journal article supplement (PMC8223444)
Supplement: NIHMS1696791-supplement-fig_E2.pdf [file NIHMS1696791-supplement-fig_E2.pdf]

**Assessed for Eligibility (n=27)**

**Excluded (n=9)**  
- Screen Failure (n=8)  
- Lost to Follow-Up (n=1)

**Initiated & Completed Open Label Treatment with Omalizumab (n=18)**  
- Males (n=6)  
- Females (n=12)
