# Supplementary material
Source: PubMed Central journal article supplement (PMC8223444)

# Basophils/ml of blood

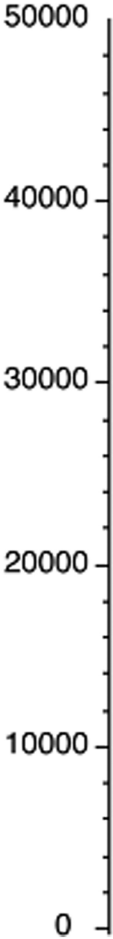

Supplement: NIHMS1696791-supplement-fig_E1.pdf [file NIHMS1696791-supplement-fig_E1.pdf]

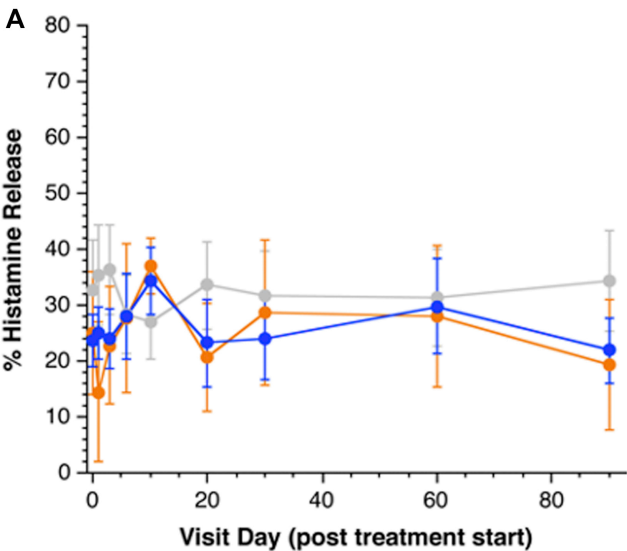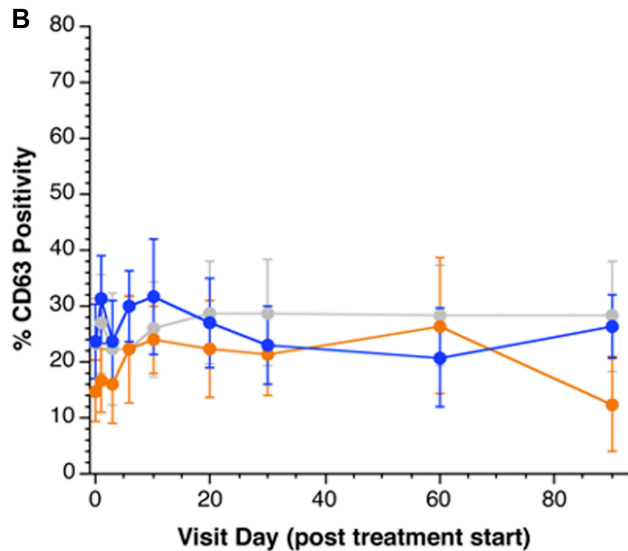

Supplement: NIHMS1696791-supplement-fig_E3.pdf [file NIHMS1696791-supplement-fig_E3.pdf]

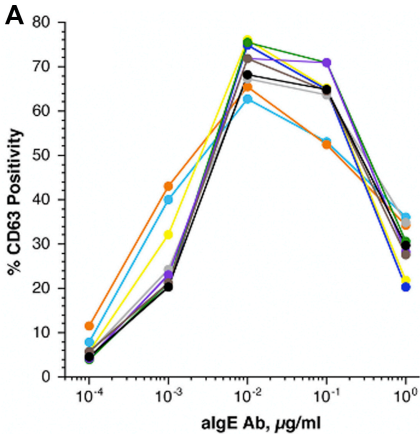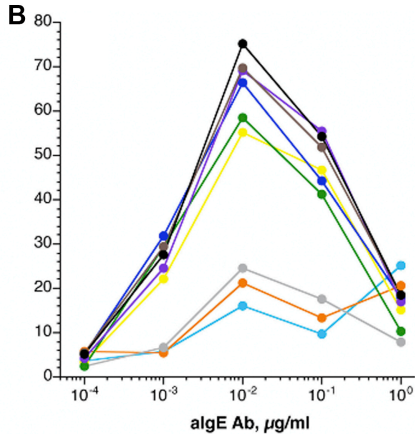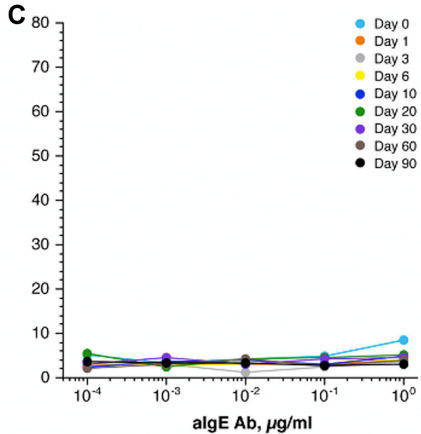

Supplement: NIHMS1696791-supplement-fig_E4.pdf [file NIHMS1696791-supplement-fig_E4.pdf]

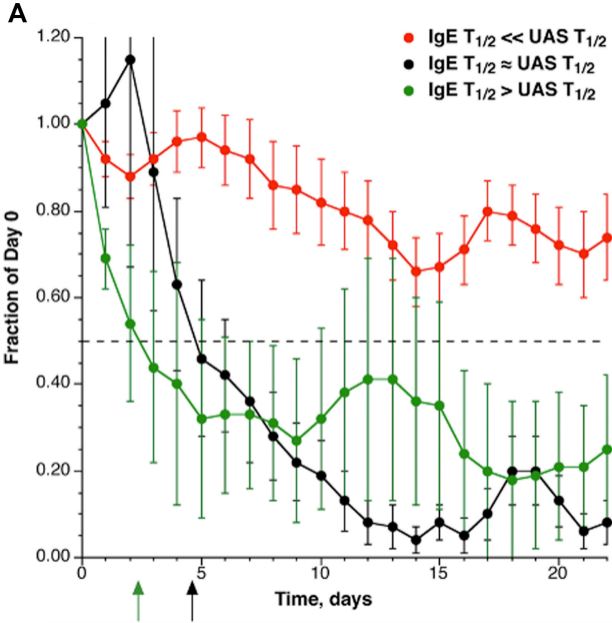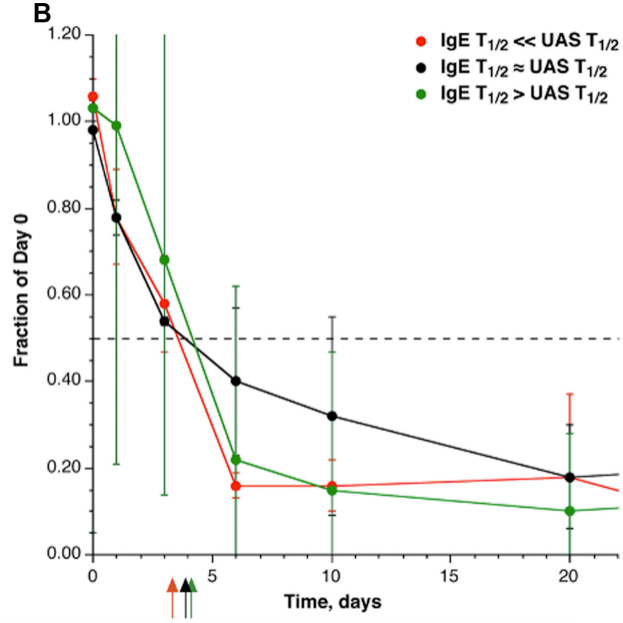

Supplement: NIHMS1696791-supplement-fig_E5.pdf [file NIHMS1696791-supplement-fig_E5.pdf]

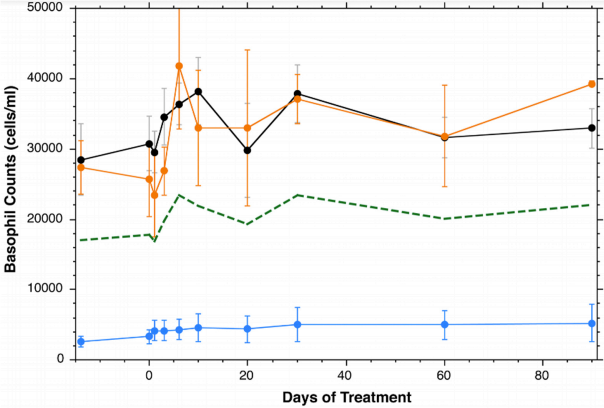

Supplement: NIHMS1696791-supplement-fig_E6.pdf [file NIHMS1696791-supplement-fig_E6.pdf]

**A**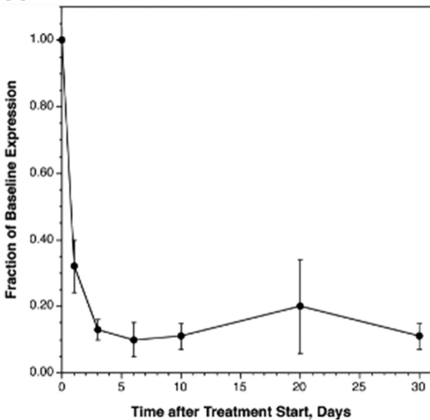**B**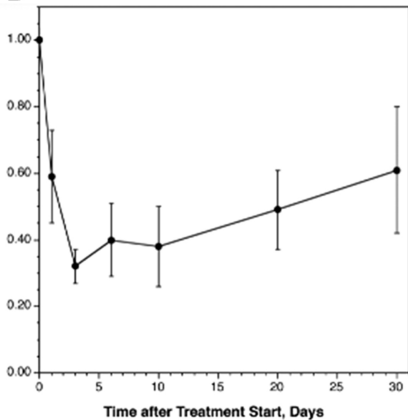**C**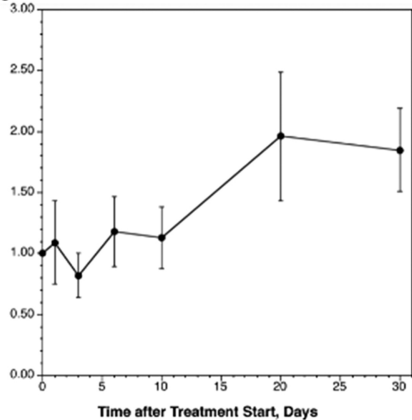

Supplement: NIHMS1696791-supplement-fig_E7.pdf [file NIHMS1696791-supplement-fig_E7.pdf]
